# Supplementary material for: Limited allele-specific gene expression in highly polyploid sugarcane
Source: HighWire-hosted journal article supplement (doi:10.1101/gr.275904.121), 2021-12-23
Supplement: Supplemental_Table_S4.xlsx [file Supplemental_Table_S4.xlsx]

## Sheet: Supplemental_Table_S4
Supplemental Table S4. Functional enrichment of genes with allele-specific expression according to Gene Ontology terms. Functional terms are in the rows and treatments are in the columns. Significant p-values are shown (p < 0.05) after false discovery rate correction for multiple tests.
GO Term	KQ228 C1 In5	KQ228 C1 In8	KQ228 C2 In5	KQ228 C2 In8	KQ228 C2 InEx 5	KQB09 C1 In5	KQB09 C1 In8	KQB09 C2 In5	KQB09 C2 In8	KQB09 C2 InEx 5	MQ239 C1 In5	MQ239 C1 In8	MQ239 C2 In5	MQ239 C2 In8	MQ239 C2 InEx 5	Q155 C1 In5	Q155 C1 In8	Q155 C2 In5	Q155 C2 In8	Q155 C2 InEx 5	Q186 C1 In5	Q186 C1 In8	Q186 C2 In5	Q186 C2 In8	Q186 C2 InEx 5	SRA1 C1 In5	SRA1 C1 In8	SRA1 C2 In5	SRA1 C2 In8	SRA1 C2 InEx 5	SRA5 C1 In5	SRA5 C1 In8	SRA5 C2 In5	SRA5 C2 In8	SRA5 C2 InEx 5
GO:0043531 ADP binding	0.000436331	0.00293876	8.68872e-05	0.000261977	0.000260467	9.00643e-05	0.000350121	0	0	0.000569467	0.0246058	0.00264619	0.00309262	0.00106276	0.0359689	0.00647839	0.000350643	0.000350983	0.000785309	0	0.00192858	0	0.000445215	0.000177004	0	0.000439656	0.00157161	0	0.000263833	0	0.000581809	0	0	0.000340799	8.56069e-05
GO:0006952 defense response	0.0365662	0.00568699	0.0096477	0.0218749	0.00448875	0.00480602	0.00498139	0.00432974	0.00231243	0.00352448	NA	0.0140668	0.0426446	0.00793993	0.0255473	NA	0.0164678	NA	NA	0.00227727	NA	0.0119527	NA	0.00132581	0.00522613	0.0188892	0.0110883	0.003096	0.000969657	0.000437022	NA	0.0190669	0.00146989	0.0064093	0.00267091
GO:0008194 UDP-glycosyltransferase activity	NA	0.0187172	0.0120195	0.0446473	0.00202214	0.00040349	0.0420965	0.0328967	0.00171934	NA	0.000634493	0.000851099	0.00181205	0.0114229	NA	0.0248035	0.00172908	0.0123336	NA	0.0238296	0.0170403	0.0107979	NA	NA	NA	0.0152863	0.00894773	8.82295e-05	NA	0.0157899	0.000784107	0.000257069	0.0125256	0.00132465	0.000509868
GO:0008146 sulfotransferase activity	0.00902863	0.00610595	0.00307625	0.00142897	0.00529359	0.00199915	0.0137139	0	0.0302866	NA	0.00732392	NA	0.00634156	0.0236133	NA	0.00150929	0.00118669	0.00276565	0.0456553	0.0222619	0.00122659	NA	0.0407657	0.00926817	NA	0.00601056	0.00872721	0.00378627	0.0145679	NA	NA	0.0187802	0.00403085	NA	NA
GO:0051923 sulfation	0.0375873	0.0227677	0.00722978	0.033752	NA	0.00444156	0.0215329	0.00186428	NA	NA	0.0229782	NA	NA	NA	NA	0.00547151	0.00722223	0.00257494	0.0471692	NA	0.00179631	NA	0.0487942	NA	NA	0.03658	0.00942824	0.00672911	0.0153492	NA	NA	NA	NA	NA	NA
GO:0080044 quercetin 7-O-glucosyltransferase activity	NA	NA	NA	NA	NA	0.0017977	NA	NA	0.0233905	NA	0.000421249	0.000219441	0.00807273	0.0138344	NA	0.0247586	0.00692182	NA	NA	0.0100413	NA	0.0264752	NA	NA	NA	0.0314991	NA	NA	NA	NA	0.00151536	0.000386094	NA	0.00815878	0.00847941
GO:0080043 quercetin 3-O-glucosyltransferase activity	NA	NA	NA	NA	NA	0.00168916	NA	NA	0.0212102	NA	0.000452099	0.000351224	0.00744185	0.0136967	NA	0.0284495	0.00567849	NA	NA	0.0115514	NA	0.0225182	NA	NA	NA	0.0290872	NA	NA	NA	NA	0.00132081	0.000514793	NA	0.00770122	0.00872525
GO:0008171 O-methyltransferase activity	0.0317135	NA	NA	0.0441337	0.016033	0.0177218	0.0118353	0.0479	NA	NA	NA	NA	NA	0.0153027	NA	NA	NA	NA	NA	NA	NA	NA	NA	NA	NA	NA	NA	NA	NA	NA	0.000521801	0.011687	0.00165819	0.00710503	0.0286989
GO:0016758 transferase activity, transferring hexosyl groups	NA	NA	NA	NA	0.0410381	0.00732206	NA	NA	0.0448035	NA	0.00153511	0.00430644	0.00798154	NA	NA	NA	NA	NA	NA	NA	NA	NA	NA	NA	NA	NA	0.0498216	0.003308	NA	NA	0.0136108	0.0198993	NA	0.0188914	0.026047
GO:0016866 intramolecular transferase activity	0.0216155	0.0160023	0.00363888	0.0459186	NA	0.0446561	NA	0.0195503	NA	NA	NA	NA	0.040048	NA	NA	NA	NA	NA	NA	NA	NA	NA	NA	NA	NA	NA	NA	NA	NA	NA	0.0142612	0.0296088	NA	0.00623862	0.0182566
GO:0000250 lanosterol synthase activity	0.0354088	0.013467	0.0075979	0.0453635	NA	0.0125286	NA	0.0311308	NA	NA	NA	NA	0.043559	NA	NA	NA	NA	NA	NA	NA	NA	NA	NA	NA	NA	NA	NA	NA	NA	NA	0.0146362	0.0249823	NA	0.00853288	0.0252603
GO:0016104 triterpenoid biosynthetic process	0.0327646	0.0145438	0.00904863	0.0382431	NA	0.0132511	NA	0.0253081	NA	NA	NA	NA	0.044294	NA	NA	NA	NA	NA	NA	NA	NA	NA	NA	NA	NA	NA	NA	NA	NA	NA	0.0134558	0.0244413	NA	0.00737482	0.0249302
GO:0019438 aromatic compound biosynthetic process	0.0318869	NA	NA	NA	0.0254206	0.00521104	0.0117526	0.0314599	NA	NA	NA	NA	NA	NA	NA	0.0386636	NA	NA	NA	NA	NA	NA	NA	NA	NA	NA	NA	NA	NA	NA	0.000698111	0.0183063	0.001595	0.0237889	0.0275193
GO:0042300 beta-amyrin synthase activity	0.0307649	0.0138195	0.0102931	0.0357949	NA	0.0116271	NA	0.0273494	NA	NA	NA	NA	0.0395028	NA	NA	NA	NA	NA	NA	NA	NA	NA	NA	NA	NA	NA	NA	NA	NA	NA	0.0143569	0.0261917	NA	0.00632504	0.0227878
GO:0005811 lipid droplet	0.0388982	0.0213104	0.00715968	0.041013	NA	NA	NA	0.0328449	NA	NA	NA	NA	0.0408648	NA	NA	NA	NA	NA	NA	NA	NA	NA	NA	NA	NA	NA	NA	NA	NA	NA	0.0186889	0.0253508	NA	0.00538374	0.0246092
GO:0044550 secondary metabolite biosynthetic process	NA	NA	NA	NA	0.000605442	NA	NA	0.00500582	NA	0.000527319	0.0292208	NA	NA	NA	NA	NA	NA	NA	NA	NA	0.0043175	0.0163825	NA	NA	NA	NA	NA	NA	NA	0.0408721	0.0120688	0.017337	NA	NA	NA
GO:0007178 transmembrane receptor protein serine/threonine kinase signaling pathway	NA	NA	NA	NA	NA	0.0146486	0.0477566	NA	0.0299774	0.0198737	NA	NA	NA	0.0349114	NA	NA	NA	NA	NA	NA	NA	NA	NA	NA	NA	NA	NA	NA	0.0131965	0.0145434	NA	NA	NA	NA	NA
GO:0032549 ribonucleoside binding	NA	NA	NA	NA	NA	NA	0.0450203	NA	NA	0.0497018	NA	0.0445859	0.0234346	NA	NA	NA	NA	NA	NA	NA	NA	NA	NA	NA	NA	NA	NA	NA	NA	NA	NA	0.023223	NA	0.0366899	0.0344061
GO:0004364 glutathione transferase activity	NA	0.0216432	0.0445921	0.00121184	0.0329818	NA	NA	NA	NA	NA	NA	NA	NA	NA	NA	NA	NA	0.0146068	0.040404	NA	NA	NA	NA	NA	NA	NA	NA	NA	NA	NA	NA	NA	NA	NA	NA
GO:0016709 oxidoreductase activity, acting on paired donors, with incorporation or reduction of molecular oxygen, NAD(P)H as one donor, and incorporation of one atom of oxygen	NA	NA	NA	NA	0.0455264	NA	0.0365598	0.0205021	NA	0.000848155	NA	NA	NA	NA	NA	NA	NA	NA	NA	NA	0.0428412	NA	NA	NA	NA	NA	NA	NA	NA	NA	0.0205128	NA	NA	NA	NA
GO:0004497 monooxygenase activity	NA	NA	NA	NA	0.00716059	NA	0.0379926	0.00490679	NA	0.00201855	NA	NA	NA	NA	NA	NA	NA	NA	NA	NA	NA	NA	NA	NA	NA	NA	NA	NA	NA	NA	0.0413105	NA	NA	NA	NA
GO:0002229 defense response to oomycetes	NA	NA	NA	NA	NA	0.00447676	NA	NA	0.00829468	0.0204275	NA	NA	NA	0.0252545	NA	NA	NA	NA	NA	NA	NA	NA	NA	NA	NA	NA	NA	NA	NA	0.0273158	NA	NA	NA	NA	NA
GO:0017110 nucleoside-diphosphatase activity	NA	NA	0.0489286	NA	NA	NA	NA	NA	NA	NA	0.0277682	NA	0.0427756	0.03701	NA	NA	NA	NA	NA	NA	NA	NA	NA	NA	NA	NA	NA	NA	NA	NA	NA	NA	NA	NA	NA
GO:0009407 toxin catabolic process	0.016897	0.00471956	NA	0.00239968	NA	NA	NA	NA	NA	NA	NA	NA	NA	NA	NA	NA	NA	NA	NA	NA	NA	NA	NA	NA	NA	NA	NA	NA	NA	NA	NA	NA	NA	NA	NA
GO:0016760 cellulose synthase (UDP-forming) activity	NA	0.0145367	0.0330209	0.0407082	NA	NA	NA	NA	NA	NA	NA	NA	NA	NA	NA	NA	NA	NA	NA	NA	NA	NA	NA	NA	NA	NA	NA	NA	NA	NA	NA	NA	NA	NA	NA
GO:0016705 oxidoreductase activity, acting on paired donors, with incorporation or reduction of molecular oxygen	NA	NA	NA	NA	NA	NA	0.0363246	0.0291064	NA	0.00405331	NA	NA	NA	NA	NA	NA	NA	NA	NA	NA	NA	NA	NA	NA	NA	NA	NA	NA	NA	NA	NA	NA	NA	NA	NA
GO:0030247 polysaccharide binding	NA	NA	NA	NA	NA	NA	NA	NA	NA	0.00831564	NA	NA	NA	NA	NA	NA	NA	NA	NA	NA	NA	NA	NA	0.0121877	NA	NA	NA	NA	NA	NA	NA	NA	NA	0.0254215	NA
GO:0009134 nucleoside diphosphate catabolic process	NA	NA	NA	NA	NA	NA	NA	NA	NA	NA	0.0253886	NA	0.0426955	0.0351509	NA	NA	NA	NA	NA	NA	NA	NA	NA	NA	NA	NA	NA	NA	NA	NA	NA	NA	NA	NA	NA
GO:0009833 plant-type primary cell wall biogenesis	NA	0.0220836	0.0454818	NA	NA	NA	NA	NA	NA	NA	NA	NA	NA	NA	NA	NA	NA	NA	NA	NA	NA	NA	NA	NA	NA	NA	NA	NA	NA	NA	NA	NA	NA	NA	NA
GO:0080032 methyl jasmonate esterase activity	NA	NA	NA	0.0446943	NA	NA	NA	0.0489166	NA	NA	NA	NA	NA	NA	NA	NA	NA	NA	NA	NA	NA	NA	NA	NA	NA	NA	NA	NA	NA	NA	NA	NA	NA	NA	NA
GO:0080031 methyl salicylate esterase activity	NA	NA	NA	0.0379314	NA	NA	NA	0.0494849	NA	NA	NA	NA	NA	NA	NA	NA	NA	NA	NA	NA	NA	NA	NA	NA	NA	NA	NA	NA	NA	NA	NA	NA	NA	NA	NA
GO:0048544 recognition of pollen	NA	NA	NA	NA	NA	NA	NA	NA	NA	NA	NA	NA	NA	NA	NA	NA	0.0404239	NA	NA	NA	NA	NA	NA	NA	NA	NA	NA	0.0438504	NA	NA	NA	NA	NA	NA	NA
GO:0051753 mannan synthase activity	NA	NA	0.0326889	NA	NA	NA	NA	NA	NA	NA	NA	NA	NA	NA	NA	NA	NA	NA	NA	NA	NA	NA	NA	NA	NA	NA	NA	NA	NA	NA	NA	NA	NA	NA	NA
GO:0006749 glutathione metabolic process	NA	NA	NA	0.00447761	NA	NA	NA	NA	NA	NA	NA	NA	NA	NA	NA	NA	NA	NA	NA	NA	NA	NA	NA	NA	NA	NA	NA	NA	NA	NA	NA	NA	NA	NA	NA
GO:0009696 salicylic acid metabolic process	NA	NA	NA	0.0394675	NA	NA	NA	NA	NA	NA	NA	NA	NA	NA	NA	NA	NA	NA	NA	NA	NA	NA	NA	NA	NA	NA	NA	NA	NA	NA	NA	NA	NA	NA	NA
GO:0080030 methyl indole-3-acetate esterase activity	NA	NA	NA	0.0401506	NA	NA	NA	NA	NA	NA	NA	NA	NA	NA	NA	NA	NA	NA	NA	NA	NA	NA	NA	NA	NA	NA	NA	NA	NA	NA	NA	NA	NA	NA	NA
GO:0070192 chromosome organization involved in meiotic cell cycle	NA	NA	NA	0.0488943	NA	NA	NA	NA	NA	NA	NA	NA	NA	NA	NA	NA	NA	NA	NA	NA	NA	NA	NA	NA	NA	NA	NA	NA	NA	NA	NA	NA	NA	NA	NA
GO:0020037 heme binding	NA	NA	NA	NA	NA	NA	NA	NA	NA	0.0263979	NA	NA	NA	NA	NA	NA	NA	NA	NA	NA	NA	NA	NA	NA	NA	NA	NA	NA	NA	NA	NA	NA	NA	NA	NA
GO:0050662 coenzyme binding	NA	NA	NA	NA	NA	NA	NA	NA	NA	NA	NA	NA	NA	NA	NA	NA	NA	NA	NA	NA	NA	NA	NA	NA	NA	0.00578849	NA	NA	NA	NA	NA	NA	NA	NA	NA
GO:0003333 amino acid transmembrane transport	NA	NA	NA	NA	NA	NA	NA	NA	NA	NA	NA	NA	NA	NA	NA	NA	NA	NA	NA	NA	NA	NA	NA	NA	NA	NA	NA	0.046407	NA	NA	NA	NA	NA	NA	NA
GO:0006268 DNA unwinding involved in DNA replication	NA	NA	NA	NA	NA	NA	NA	NA	NA	NA	NA	NA	NA	NA	NA	NA	NA	NA	NA	NA	NA	NA	NA	NA	NA	NA	NA	0.0418943	NA	NA	NA	NA	NA	NA	NA
GO:0015171 amino acid transmembrane transporter activity	NA	NA	NA	NA	NA	NA	NA	NA	NA	NA	NA	NA	NA	NA	NA	NA	NA	NA	NA	NA	NA	NA	NA	NA	NA	NA	NA	0.0474309	NA	NA	NA	NA	NA	NA	NA
GO:0042148 strand invasion	NA	NA	NA	NA	NA	NA	NA	NA	NA	NA	NA	NA	NA	NA	NA	NA	NA	NA	NA	NA	NA	NA	NA	NA	NA	NA	NA	NA	NA	NA	NA	NA	NA	0.0473469	NA
